# Supplementary material for: Novel phages of healthy skin metaviromes from South Africa
Source: PubMed Central journal article supplement (PMC6095929; doi:10.1038/s41598-018-30705-1), 2018-08-16
Supplement: 41598_2018_30705_MOESM1_ESM.pdf [file 41598_2018_30705_MOESM1_ESM.pdf]

1 **Title: Novel phages of healthy skin metaviromes from South Africa**

2 **Running title: Phages from skin metavirome**

3  
4  
5 Leonardo Joaquim van Zyl<sup>1\*</sup>, Yoonus Abrahams<sup>1</sup>, Emily Amor Stander<sup>1</sup>, Bronwyn Michelle Kirby-  
6 McCollough<sup>1</sup>, Roland Jourdain<sup>2</sup>, Cécile Clavaud<sup>2</sup>, Lionel Breton<sup>2</sup>, Marla Trindade<sup>1</sup>

7  
8 <sup>1</sup> Institute for Microbial Biotechnology and Metagenomics (IMBM), University of the Western Cape,  
9 Robert Sobukwe Road, Bellville, Cape Town, South Africa.

10  
11 <sup>2</sup> L'Oréal Research and Innovation, 1 Avenue Eugène Schueller, 93600 Aulnay sous Bois, France

12  
13 \* Author to whom correspondence should be addressed; Leonardo Joaquim van Zyl, e-mail:  
14 vanzylj@gmail.com; Tel.: +27 21 959 2325

15  
16 Email: Leonardo Joaquim van Zyl: vanzylj@gmail.com; Cécile Clavaud: cclavaud@rd.loreal.com;  
17 Roland Jourdain: rjourdain@rd.loreal.com; Lionel Breton: lbreton@rd.loreal.com; Marla I. Trindade:  
18 prof.marlatt@gmail.com

19  
20  
21 Keywords: Bacteriophage, skin, Stb20, metagenomics

22  
23  
24  
25  
26  
27  
28  
29

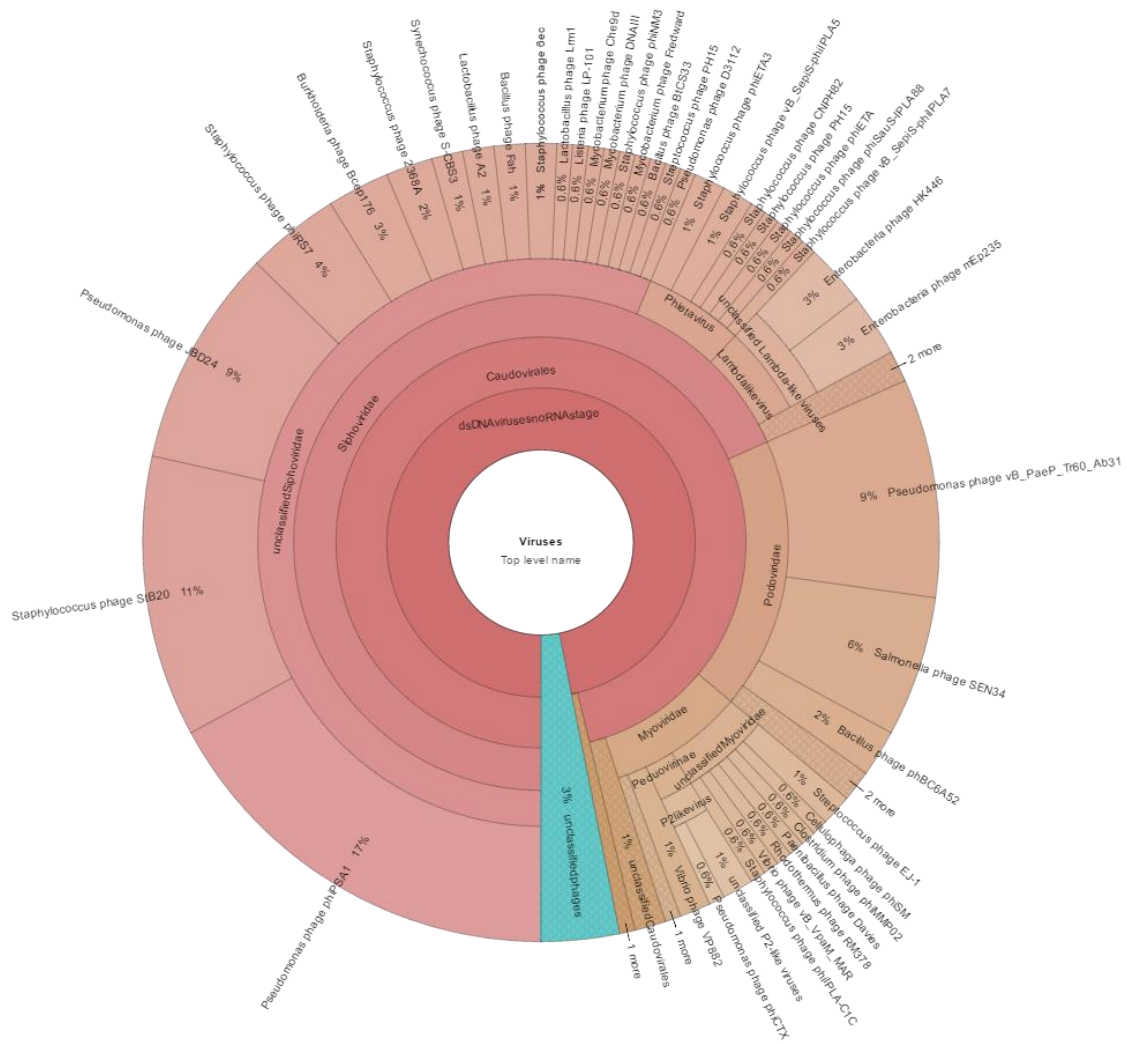

31

32

33 **Figure S1.** Taxonomic profile of contigs recovered from the combined skin metaviromes

34

35

36

37

38

39

40

41

42

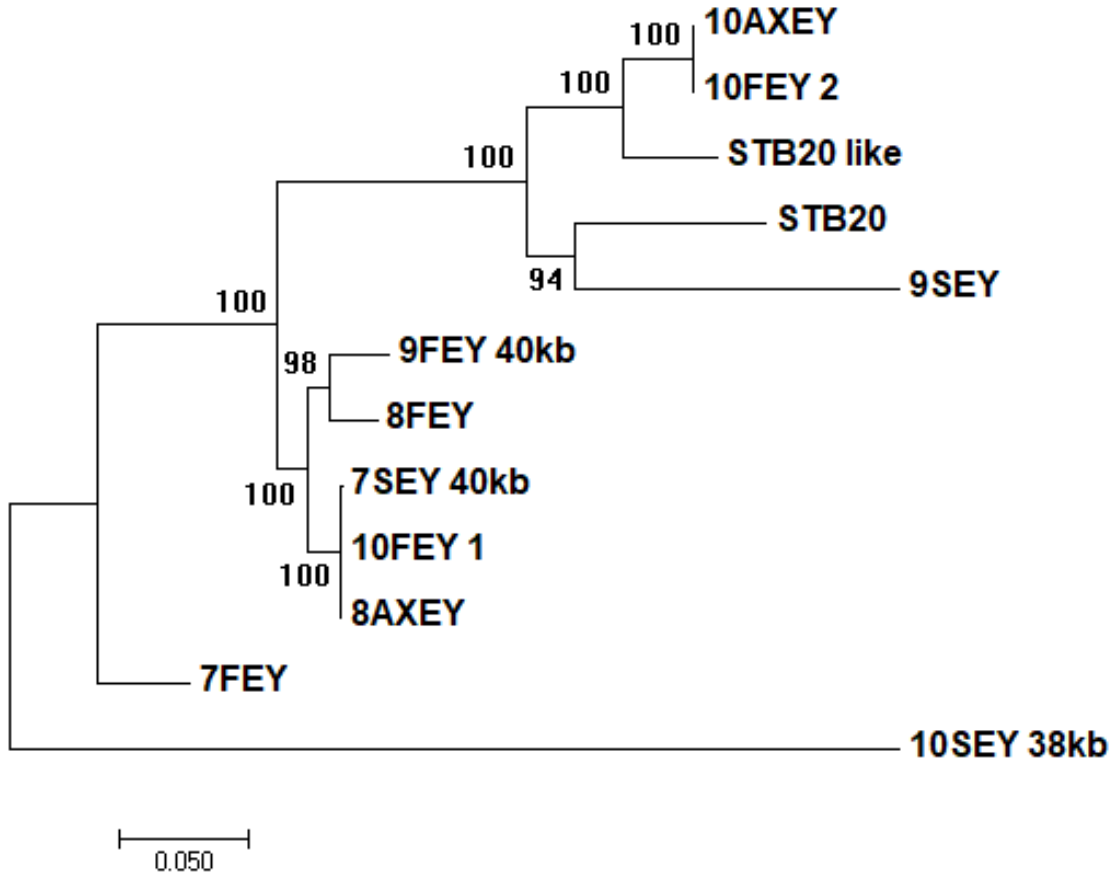

44

45

46 **Figure S2.** The evolutionary history of Stb20-like phages was inferred using the Neighbor-Joining  
47 method. Branch lengths in the same units as those of the evolutionary distances used to infer the  
48 phylogenetic tree.

49

50

51

52

53

54

55

56

57

58

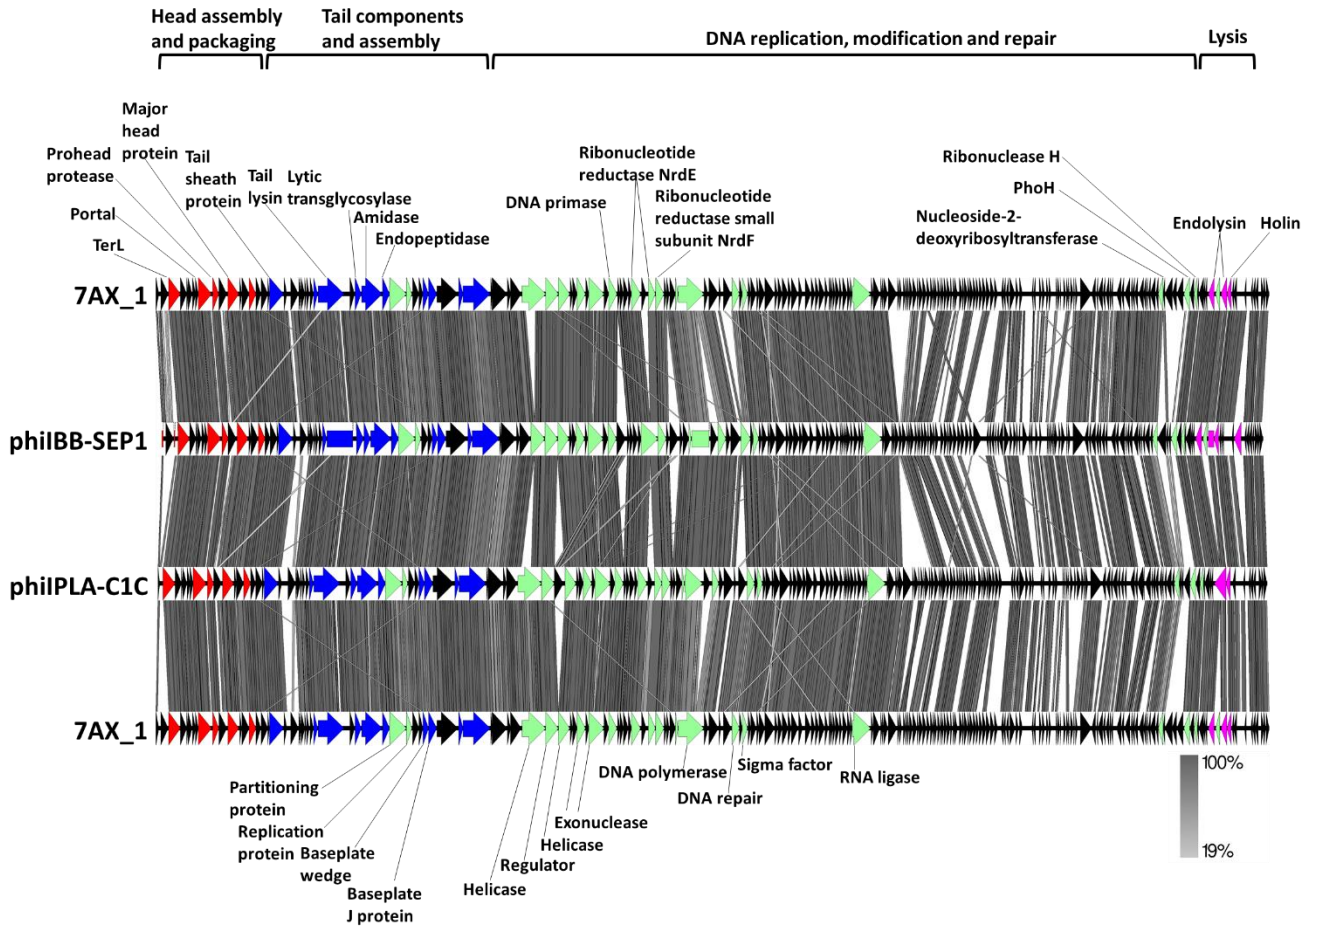

60 **Figure S3.** Comparison of the genomic structure of phiIPLA-C1C, phiIBB-SEP1 and a related phage  
61 from 7AX

62

63

64

65

66

67

68

69

70

71

72

73

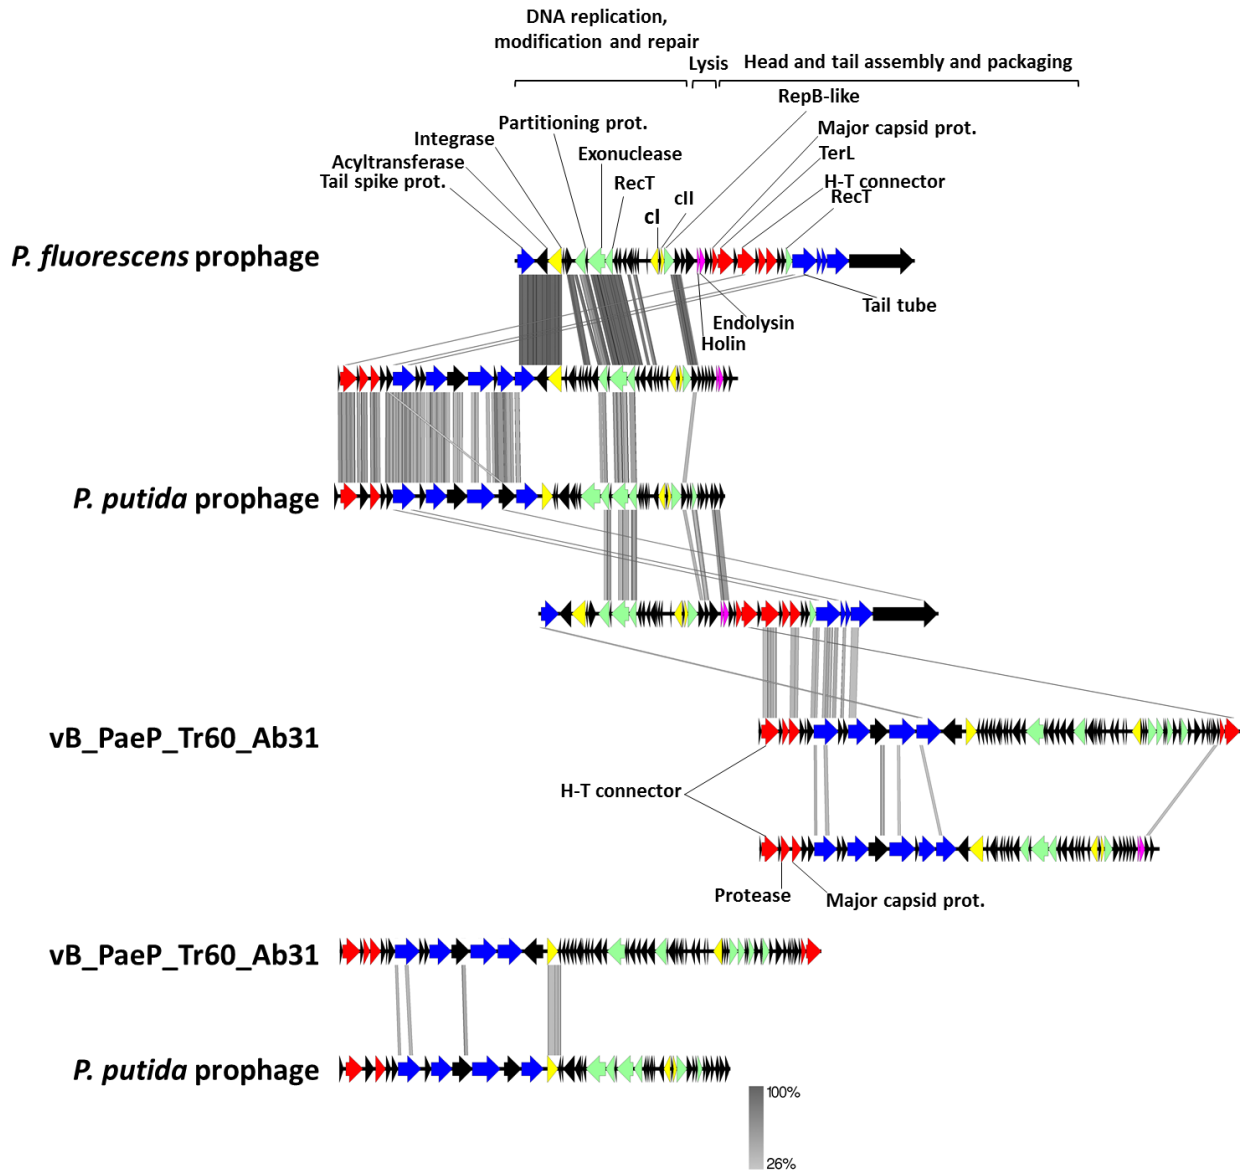

74

75 **Figure S4.** Comparison of the genomic structure of Ab31-like phages from 2AX, 3S, 7F, 7S, 7AX,

76 8AX, 8S, 9S, 9AX, 10F, 10AX to their closest relatives

77

78

79

80

81

82

83

84

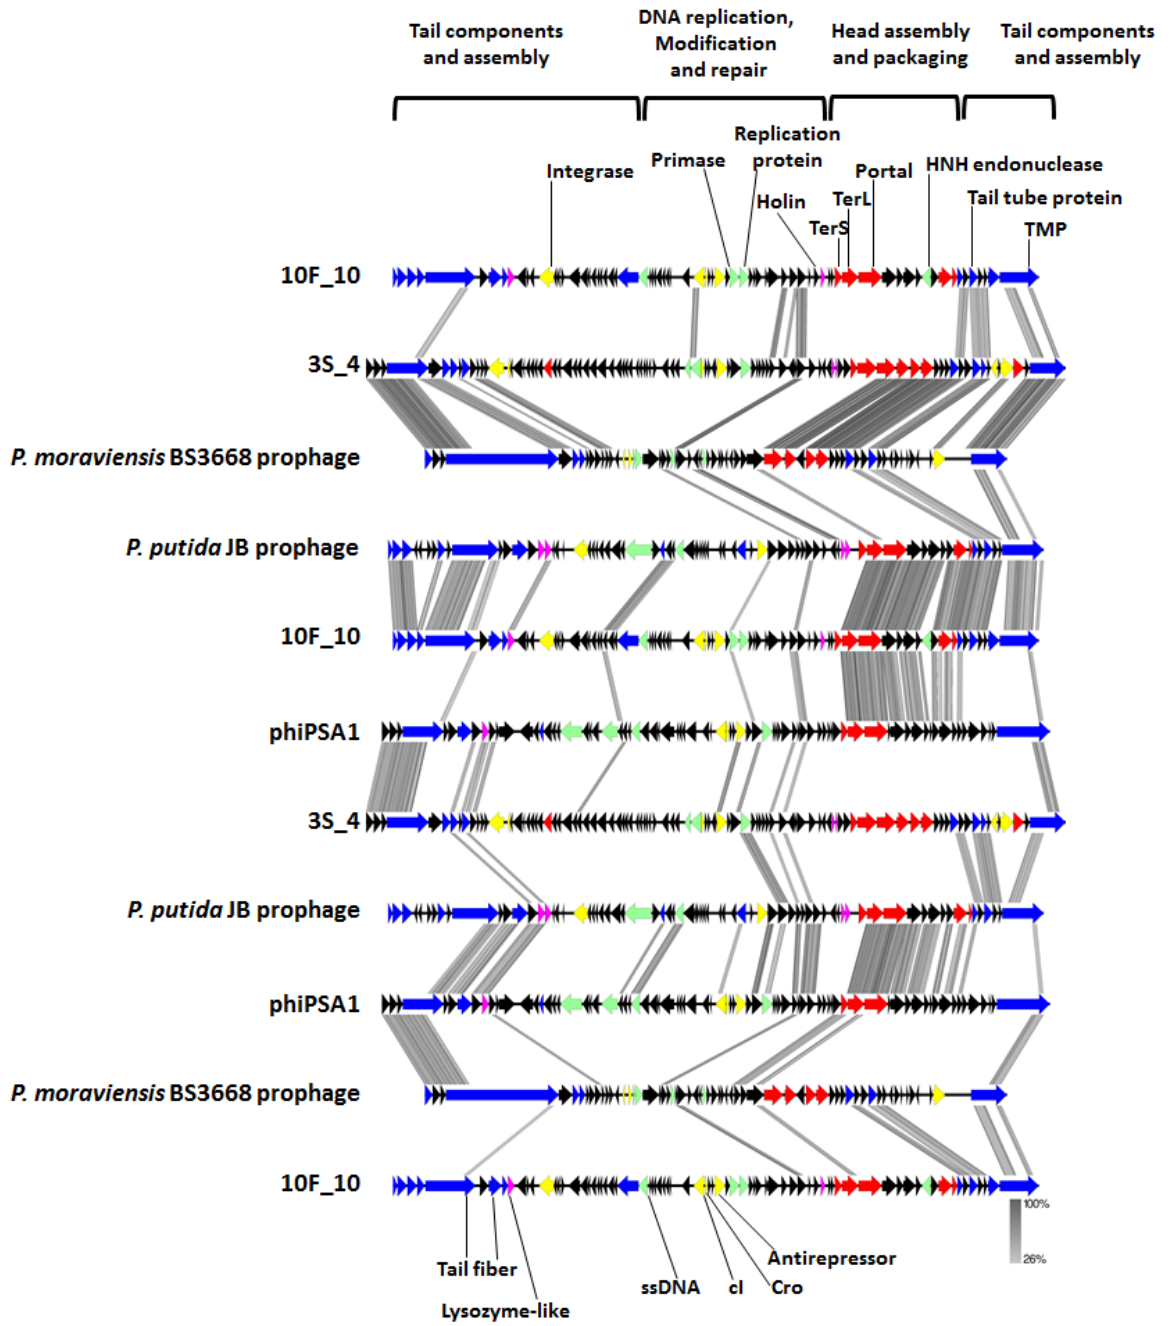

86

87 **Figure S5.** Comparison of the genomic structure of phiPSA1-like contigs from 10F and 8S to its  
 88 closest relatives

89

90

91

92

93

94

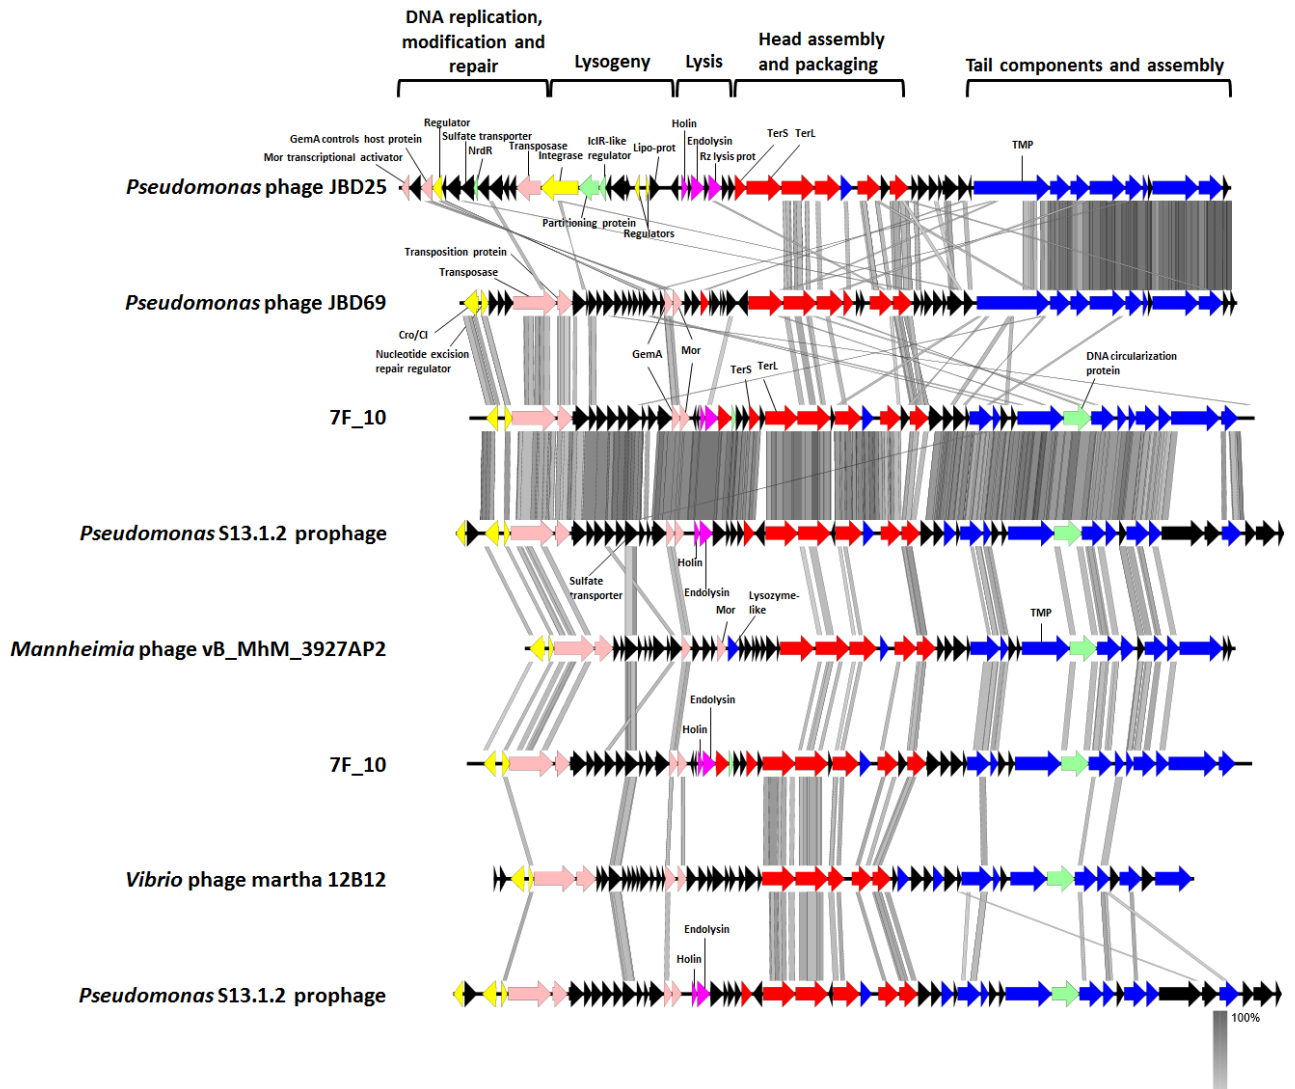

96

97 **Figure S6.** Comparison of the genomic structure of *Pseudomonas* infecting Mu-like phages

98

99

100

101

102

103

104

105

106

107

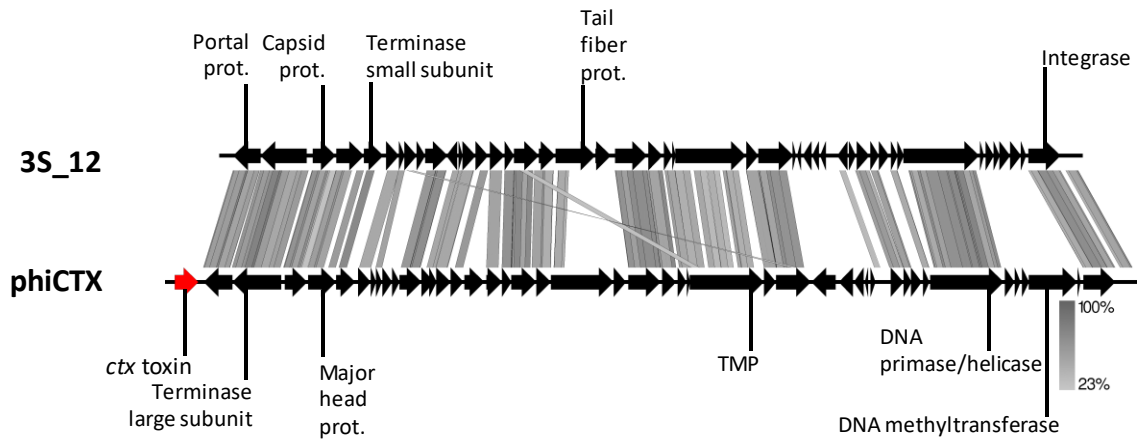

109

110 **Figure S7.** Comparison of the genomic structure of phiCTX-like contig from 3S and phiCTX. The

111 ORF highlighted in red is the *ctx* toxin

112

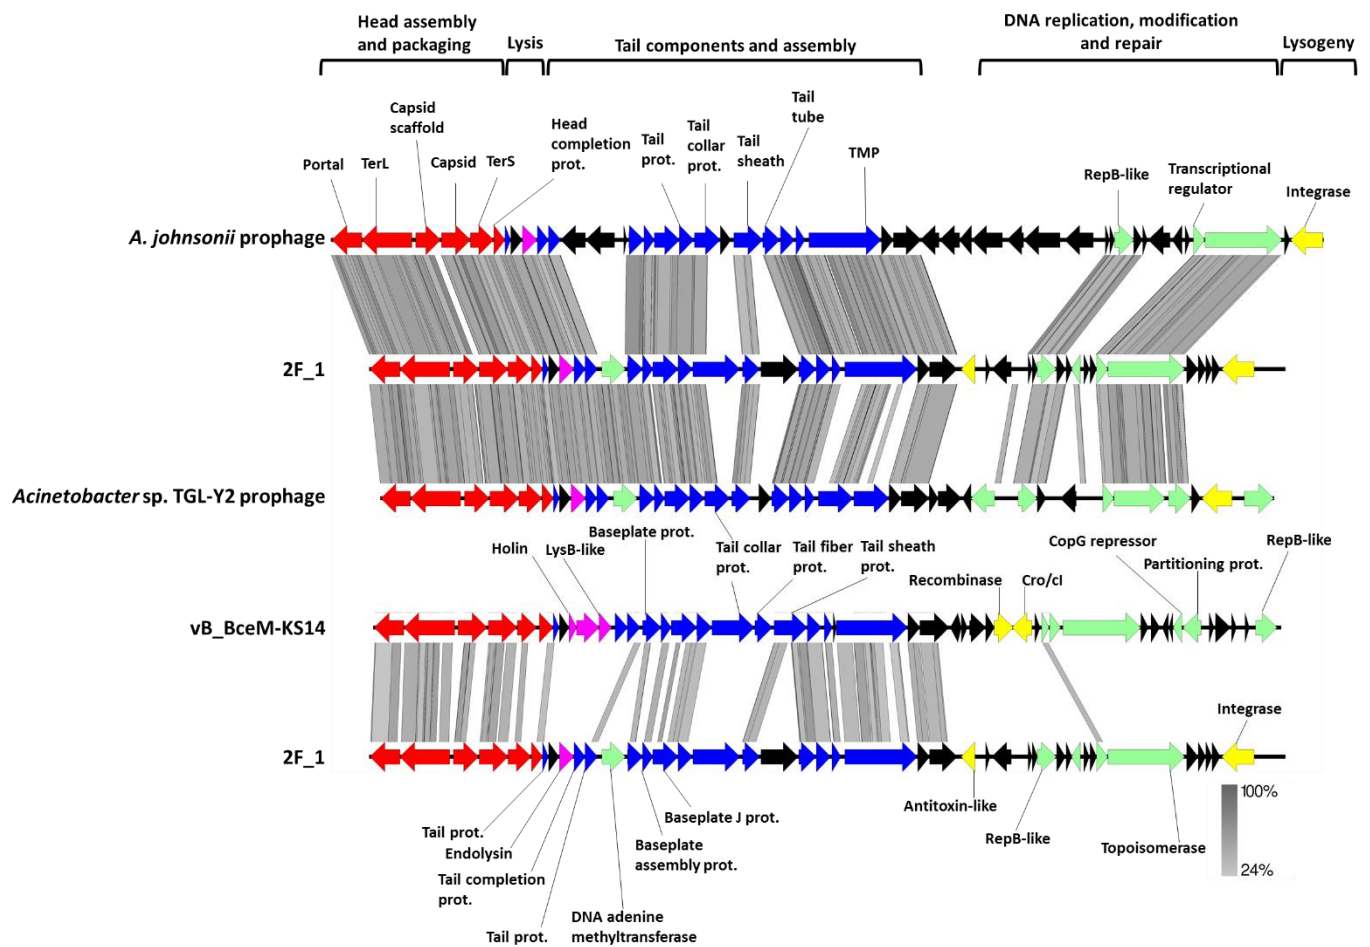

113

114

115 **Figure S8.** Comparison of the genomic structure of the vB\_Bcem-KS14-like contig from 2F to its

116 closest relatives
